# Supplementary figures and images for: Orbitofrontal neurons signal sensory associations underlying model-based inference in a sensory preconditioning task
Source: eLife journal article supplement (doi:10.7554/elife.30373), 2018-03-05

## preconditioning day 1

A

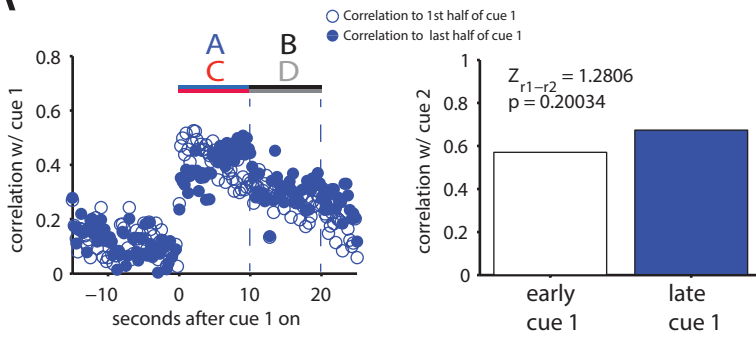

## preconditioning day 2

B

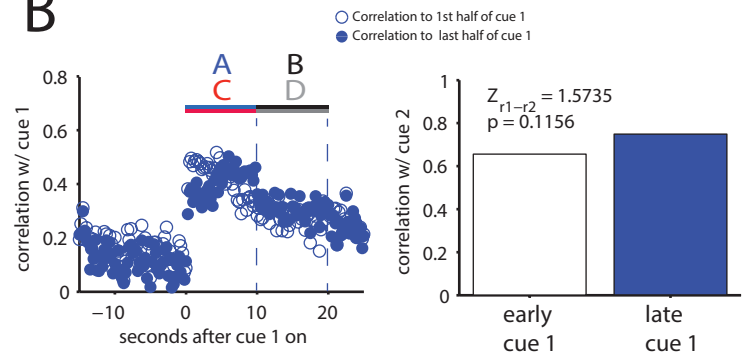

C

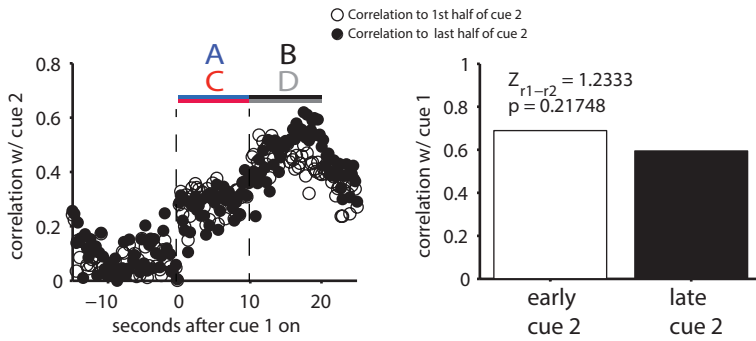

D

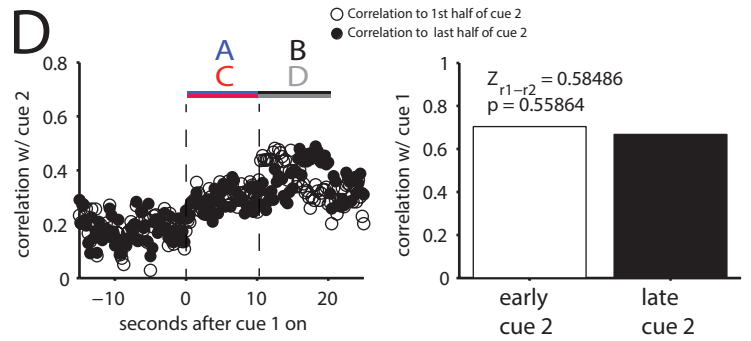

Supplement: supp [file elife-30373-supp-v1.zip]
